# Supplementary material
Source: publisher figshare collection journal article supplement (https://acs.figshare.com/ndownloader/files/14058662)
Supplement: Supplementary file 1 [file 14058662]

## Supporting Information

# Crosslinked acrylic polymers from aqueous phase of biomass pyrolysis oil and acrylated epoxidized soybean oil

*Mehul Barde<sup>†,‡</sup>, Katrina Avery<sup>†,‡</sup>, Charles W. Edmunds<sup>§</sup>, Nicole Labbé<sup>§</sup>, Maria L. Auad<sup>†,‡,\*</sup>*

<sup>†</sup>212 Ross Hall, Department of Chemical Engineering, Auburn University, Auburn 36849, AL, United States of America.

<sup>‡</sup> Center for Polymers and Advanced Composites, Auburn University, Auburn 36849, AL, United States of America.

<sup>§</sup> 2506 Jacob Drive, Center for Renewable Carbon, University of Tennessee, Knoxville 37996, TN, United States of America.

Total number of pages: 4

Total number of figures: 3

Total number of tables: 0

---

\* Corresponding author: [auad@auburn.edu](mailto:auad@auburn.edu) (Dr. Maria L. Auad)

320 Ross Hall, Department of Chemical Engineering,

Auburn University, Auburn 36849, AL, United States of America.

Contact No.: +1-334-844-5459

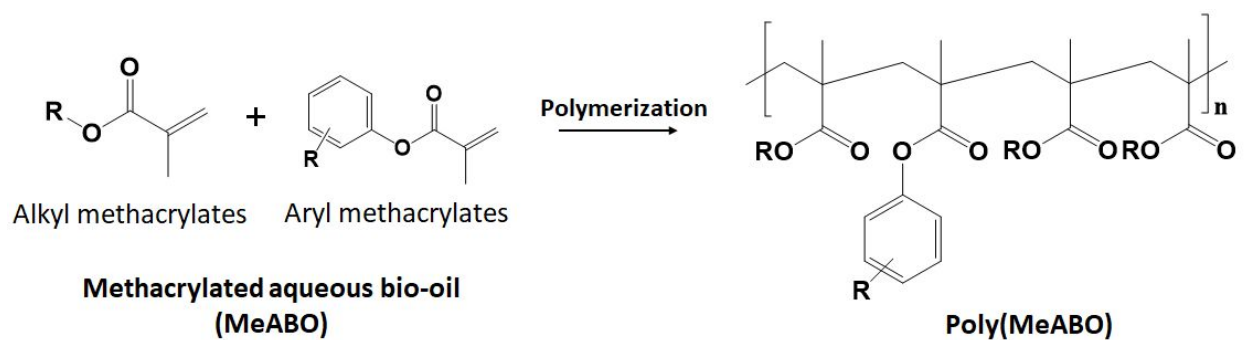

Figure S1: Polymerization of MeABO

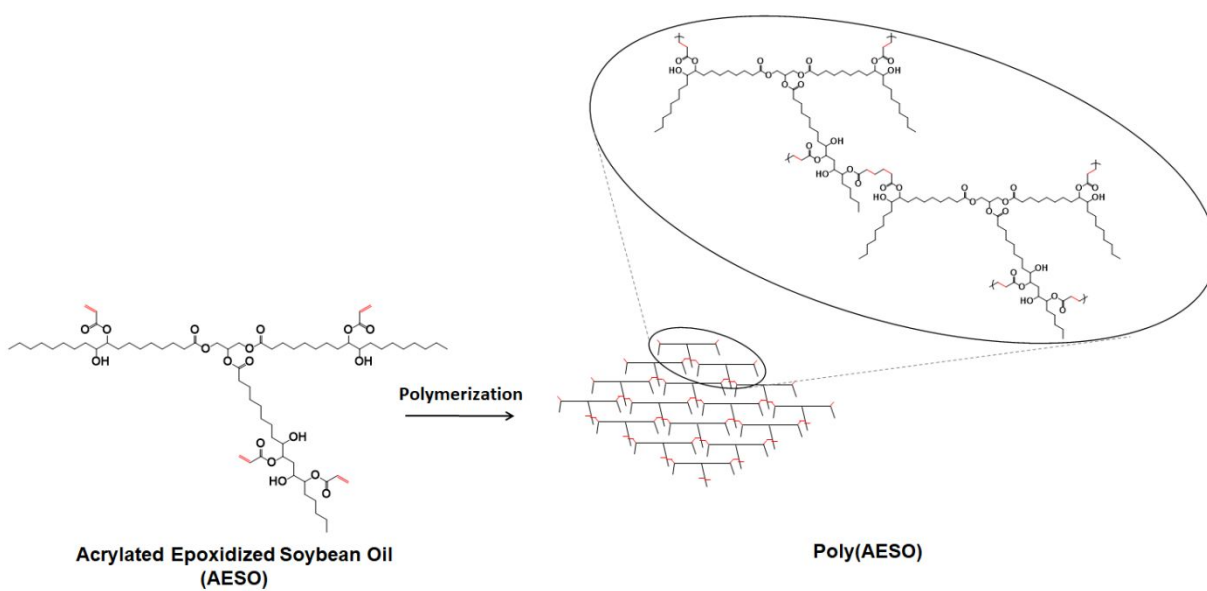

Figure S2: Polymerization of AESO

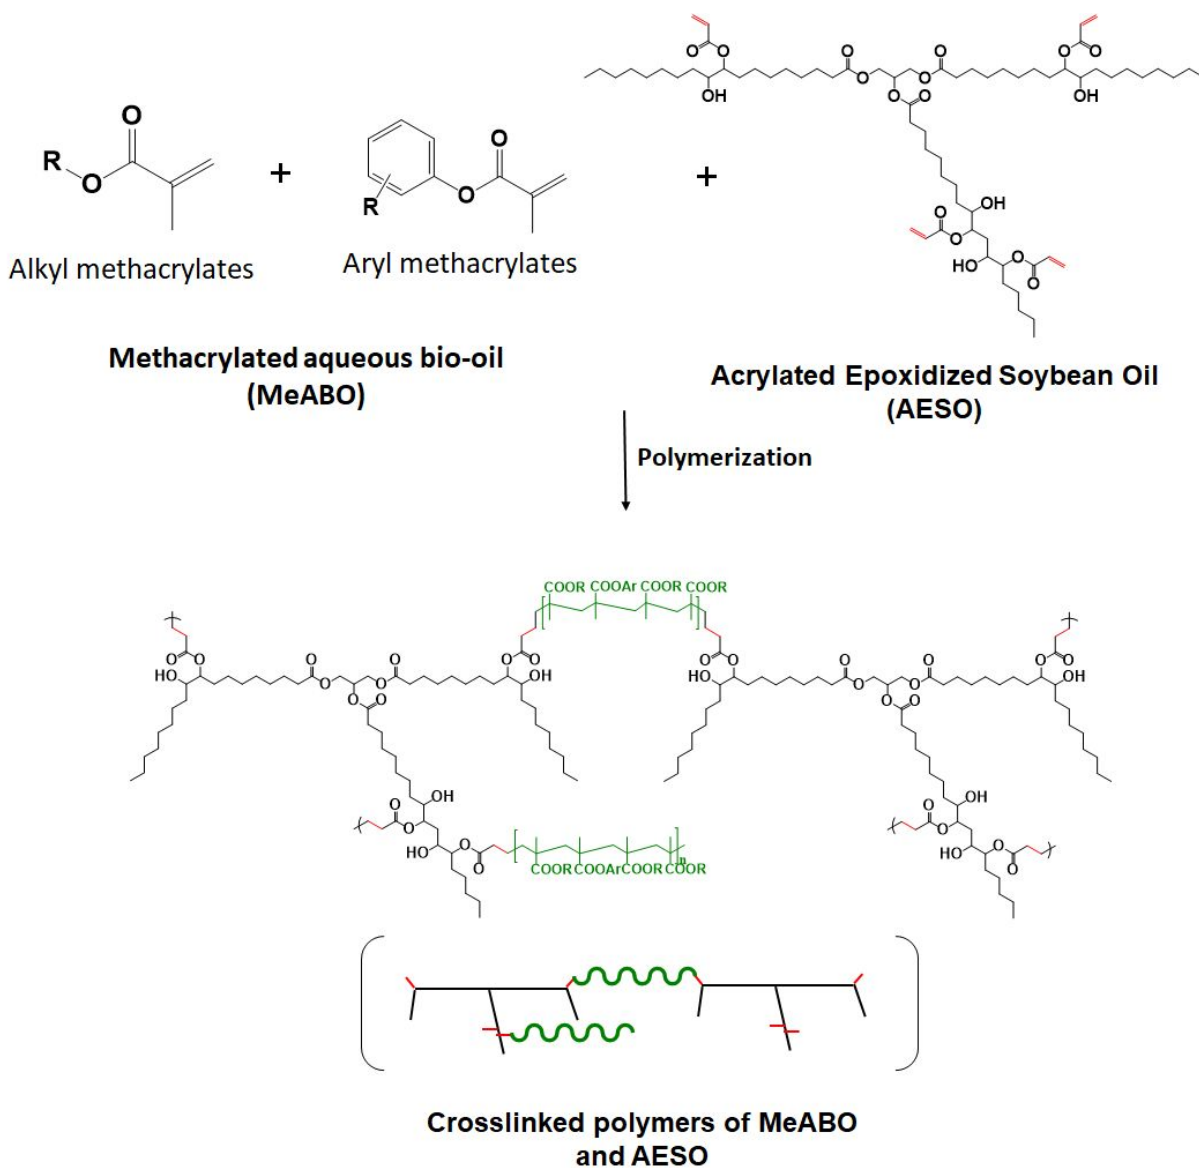

Figure S3: Polymerization of MeABO and AESO

R represents alkyl group; whereas Ar stands for aryl group. R can be any group contributed by the hydroxyl compounds present in the original bio-oil.

Figure S2 depicts a schematic of a crosslinked structure of poly(AESO) with crosslinking points between the molecular segments; and can be considered to be having higher crosslinking points than that of the polymer structure depicted in Figure S3.
